# Supplementary material for: Medical decision support for dengue shock syndrome using a bipolar linear diophantine fuzzy hypersoft model with trigonometric similarity
Source: PeerJ journal article supplement (doi:10.7717/peerj-cs.3144), 2025-09-24
Supplement: Calculations.xlsx [file Calculations.xlsx]

## Sheet: Sheet1
CALCULATION
Decision Grid for DSS Symptoms
	0.8	0.3	-0.5	-0.7		0.8	0.2	-0.4	-0.5
	0.7	0.4	-0.4	-0.8		0.4	0.5	-0.2	-0.7
	0.8	0.2	-0.4	-0.5		0.4	0.3	-0.3	-0.7
Decision Grid for X1
	0.4	0.4	-0.5	-0.8		0.7	0.3	-0.4	-0.2
	0.6	0.3	-0.4	-0.4		0.5	0.3	-0.2	-0.6
	0.8	0.2	-0.3	-0.4		0.4	0.3	-0.6	-0.8
Decision Grid for X2
	0.7	0.5	-0.4	-0.6		0.6	0.2	-0.5	-0.4
	0.6	0.2	-0.5	-0.8		0.5	0.5	-0.1	-0.7
	0.8	0.1	-0.5	-0.4		0.4	0.2	-0.3	-0.6
Decision Grid for X3
	0.4	0.3	-0.4	-0.7		0.6	0.2	-0.3	-0.1
	0.5	0.2	-0.4	-0.5		0.4	0.3	-0.2	-0.5
	0.5	0.3	-0.4	-0.5		0.5	0.3	-0.2	-0.8
										CS2(DSS,X1)	(1/3)(0.4/1.4+0.2/1.4+0.3/1.4)
											1/3(0.2+0.1+0.2)
											0.166667
										CS2(DSS,X2)	(1/3)(0.2/1.4+0.2/1.4+0.1/1.4)
											1/3(0.1+0.1+0.07)
											0.09
										CS2(DSS,X3)	(1/3)(0.4/1.4+0.3/1.4+0.3/1.4)
											1/3(0.2+0.2+0.2)
											0.2
											Comparison with CS3
										CS3(DSS,X1)	(1/3)(0.8(0.4)+0.8(0.2)+0.8(0.3))
											0.2
										CS3(DSS,X2)	(1/3)(0.8(0.2)+0.8(0.2)+0.8(0.1))
											0.133333
										CS3(DSS,X3)	(1/3)(0.8(0.4)+0.8(0.3)+0.8(0.3))
											0.233333
											Comparison with CS4
										CS4(DSS,X1)	1/3(2(0.4)+2(0.2)+2(0.3))
											0.6
										CS4(DSS,X2)	1/3(2(0.4)+2(0.4)+2(0.1))
											0.6
										CS4(DSS,X3)	1/3(2(0.4)+2(0.3)+2(0.3))
											0.666667
